# Supplementary material
Source: PubMed Central journal article supplement (PMC4240342)
Supplement: bc500392x_si_001.pdf [file bc500392x_si_001.pdf]

## ***Supporting Information***

### **Bone-Targeted Acid-Sensitive Doxorubicin Conjugate Micelles as Potential Osteosarcoma Therapeutics**

Stewart Low<sup>†</sup>, Jiyuan Yang<sup>‡</sup>, and Jindřich Kopeček<sup>\*†‡</sup>

<sup>†</sup>Department of Bioengineering, and <sup>‡</sup>Department of Pharmaceutics and Pharmaceutical Chemistry, University of Utah, Salt Lake City, Utah 84112, USA

Corresponding author: Jindřich Kopeček, Center for Controlled Chemical Delivery, 20 S, 2030 E, BPRB Rm 205B, University of Utah, Salt Lake City, UT 84112-9452, USA

Phone: 801-581-7211

Fax: 801-581-7848

E-mail: [jindrich.kopecek@utah.edu](mailto:jindrich.kopecek@utah.edu)

## **SUPPORTING DATA**

### **Table of contents**

|                                                                   |             |
|-------------------------------------------------------------------|-------------|
| <b>Fmoc-hydrazine spectra (S1-S2).....</b>                        | <b>3</b>    |
| <b>Fmoc-aminoundecanoic acid spectra (S3-S5).....</b>             | <b>3-4</b>  |
| <b>Characterization of unimers (S6-S13).....</b>                  | <b>4-8</b>  |
| <b>Characterization of DOX – unimer conjugates (S14-S17).....</b> | <b>9-10</b> |

## Fmoc-Hydrazine

The structure and purity of synthesized Fmoc-hydrazine were verified by  $^1\text{H-NMR}$  and analytical HPLC as shown below.

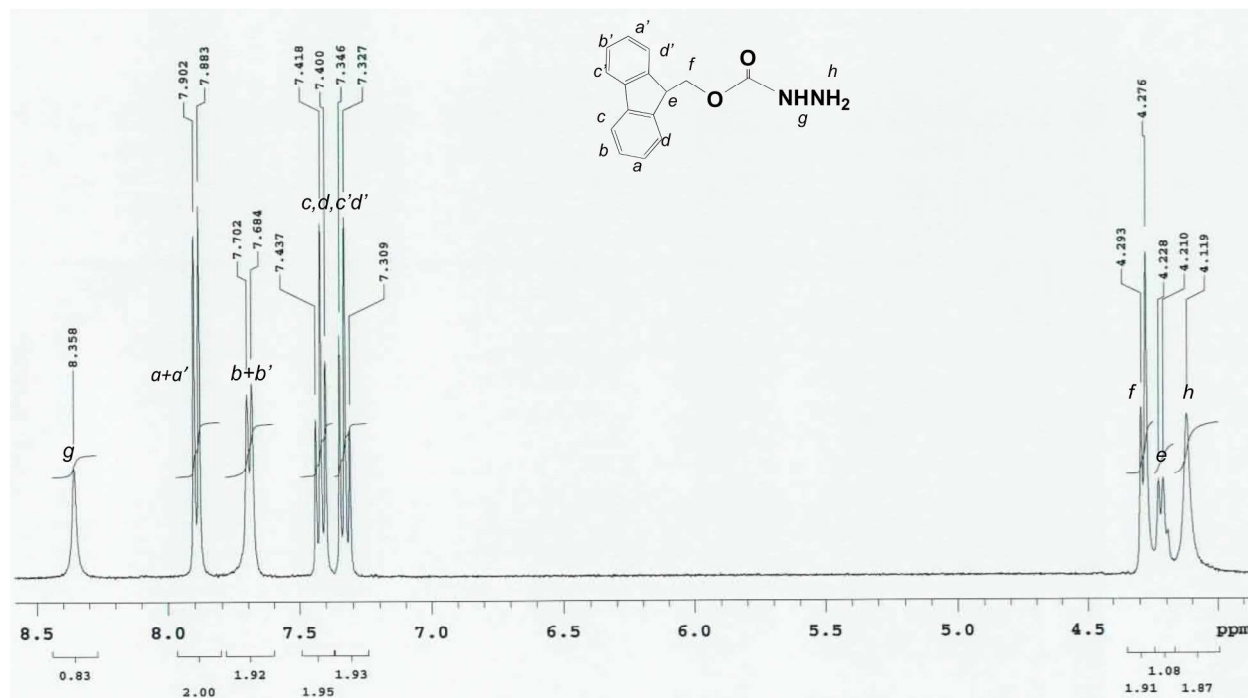

Figure S1:  $^1\text{H-NMR}$  spectrum of Fmoc-hydrazine (using  $\text{DMSO-d}_6$  as solvent on Mercury 400 spectrometer)

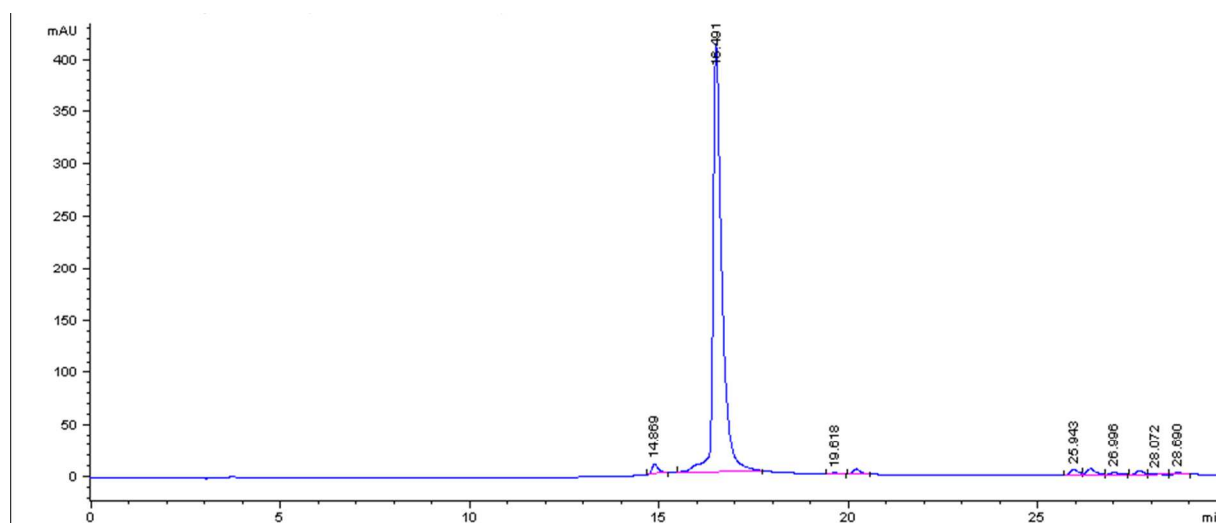

Figure S2: HPLC elution profile of Fmoc-hydrazine using Agilent Technologies 1100 series (Zorbax C18 column  $4.6 \times 250$  mm) with gradient method from 2 to 90% of Buffer B within 30 min and flow rate 1.0 mL/min (Buffer A: deionized water ( $\text{DI H}_2\text{O}$ ) with 0.1% TFA, Buffer B: acetonitrile containing 0.1% TFA).

### Fmoc-aminoundecanoic acid

Synthesized Fmoc-aminoundecanoic acid was characterized with mass spectrum, <sup>1</sup>H-NMR and HPLC analytical profiles:

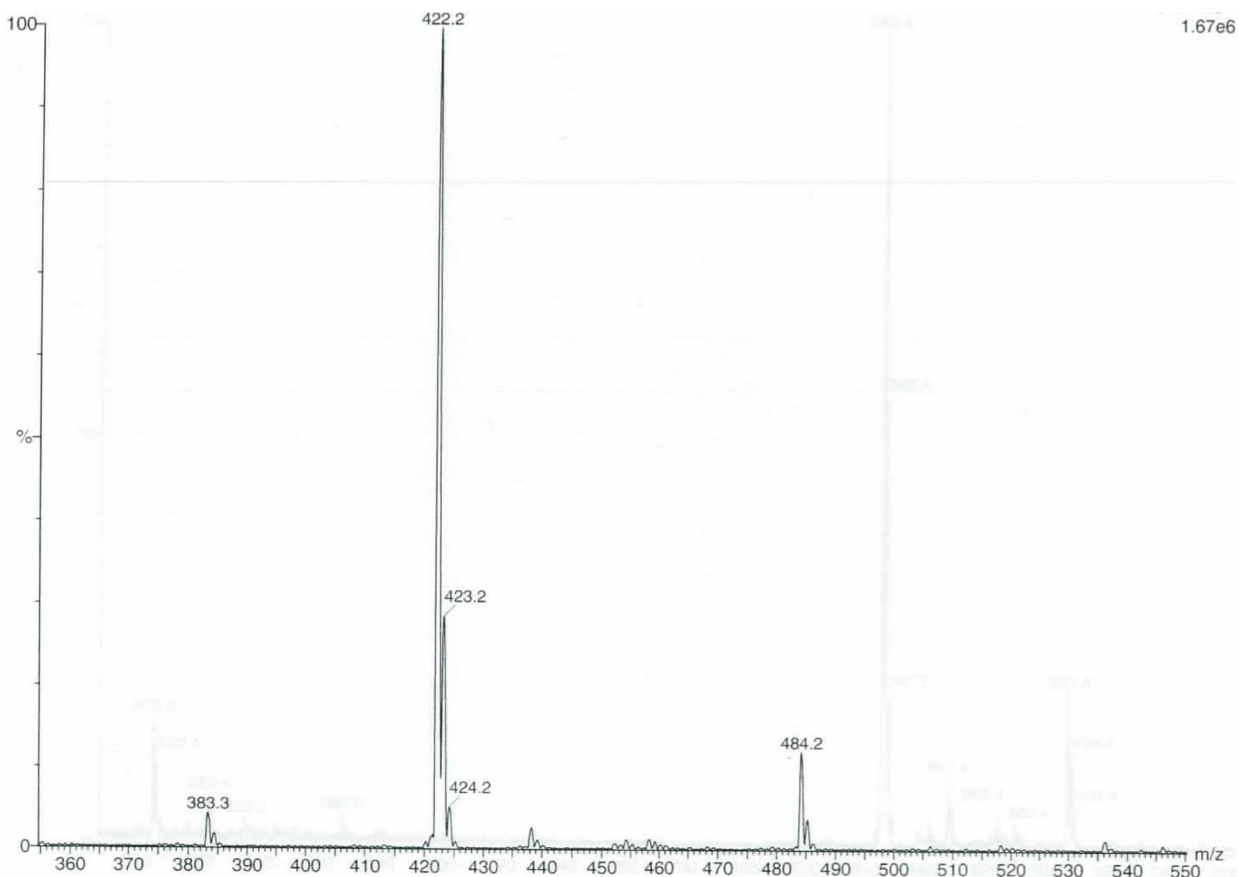

Figure S3: MALDI-ToF mass spectrum of Fmoc-aminoundecanoic acid

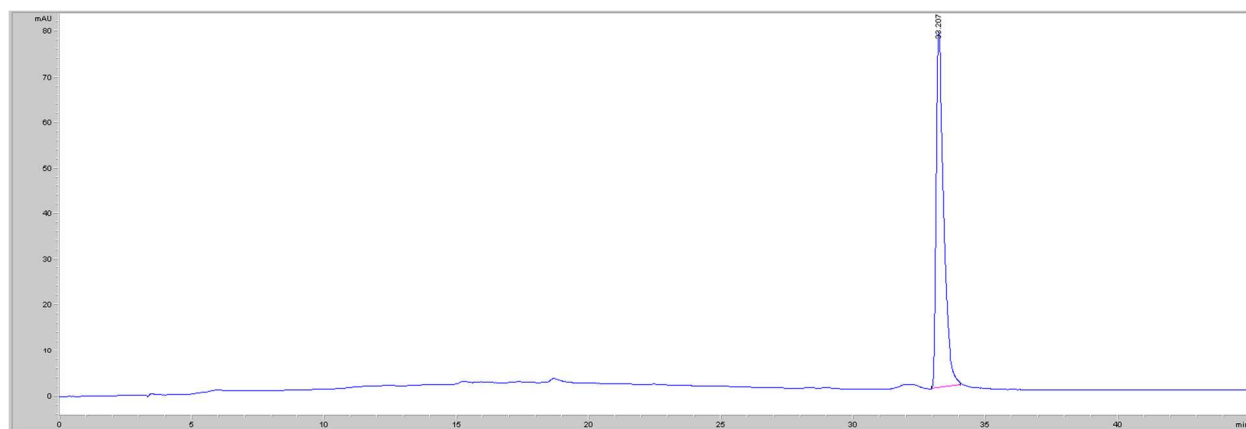

Figure S4: HPLC profile of Fmoc-aminoundecanoic acid (Fmoc-AUA) using Agilent Technologies 1100 series (Zorbax C18 column 4.6×250 mm) with gradient method from 2 to 90% of Buffer B within 30 min and flow rate 1.0 mL/min (Buffer A: deionized water (DI H<sub>2</sub>O) with 0.1% TFA, Buffer B: acetonitrile containing 0.1% TFA).

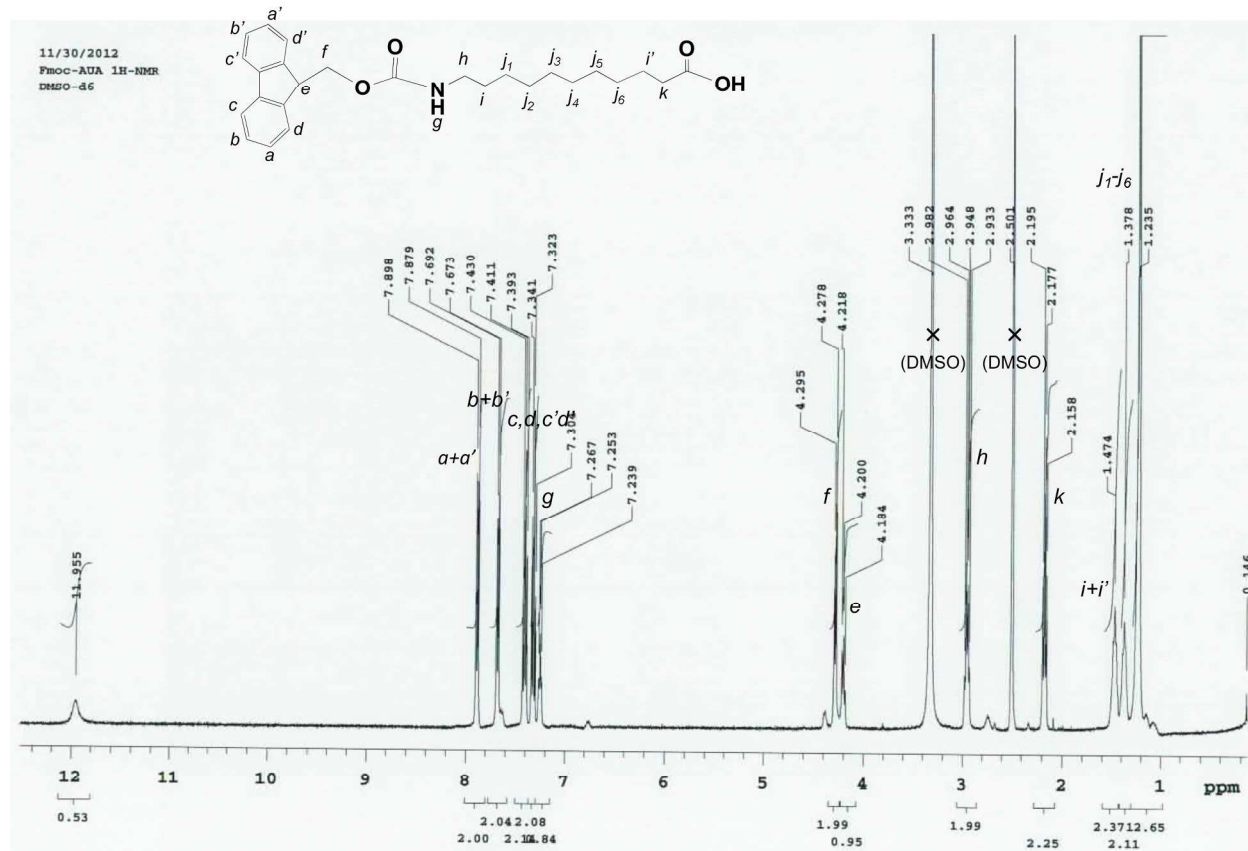

Figure S5:  $^1\text{H-NMR}$  spectrum of Fmoc-aminoundecanoic acid (DMSO-d<sub>6</sub>, recorded on Mercury 400 spectrometer)

### Characterization of unimers synthesized by solid phase peptide synthesis (SPPS)

Figures S6-S13 represent analytical HPLC and MALDI-ToF spectra of four unimers following solid phase peptide synthesis, cleavage, and preparative HPLC purification:

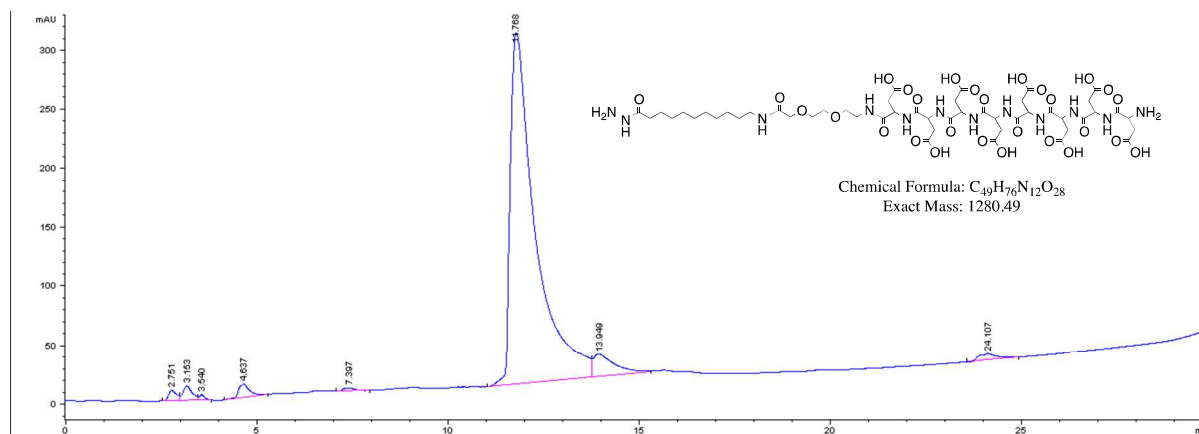

Figure S6: Structure and HPLC profile of A1-D8

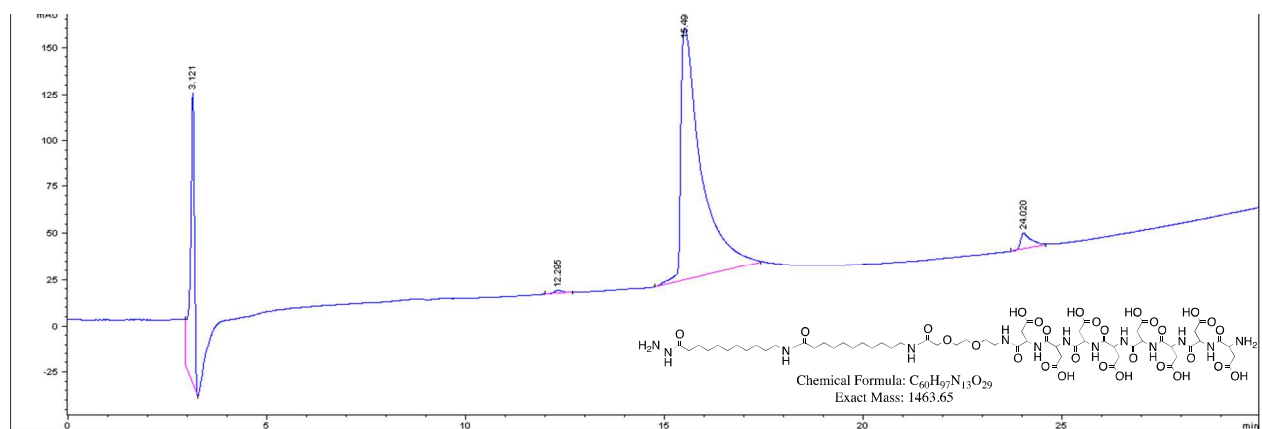

Figure S7: Structure and HPLC profile of A2-D8

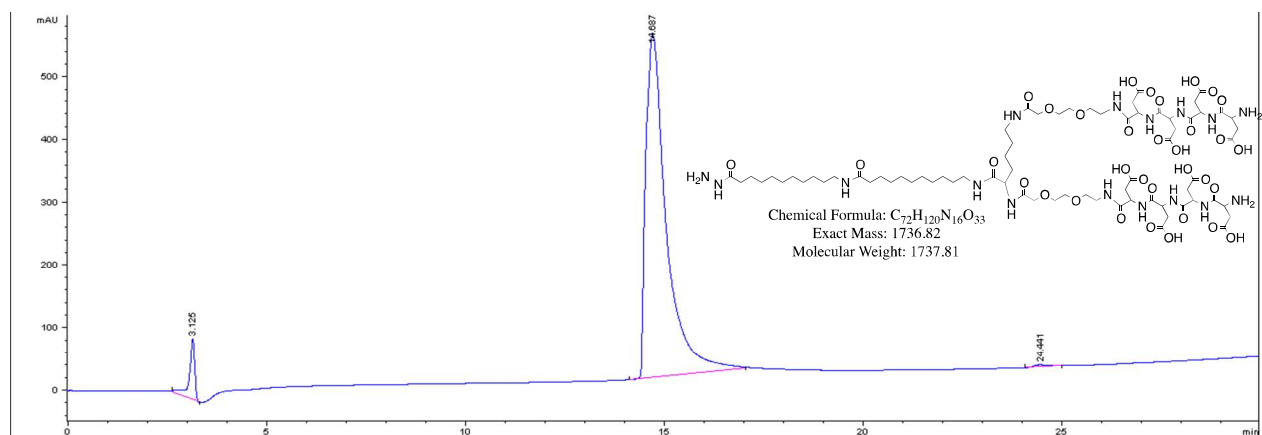

Figure S8: Structure and HPLC profile of A2-K-D4

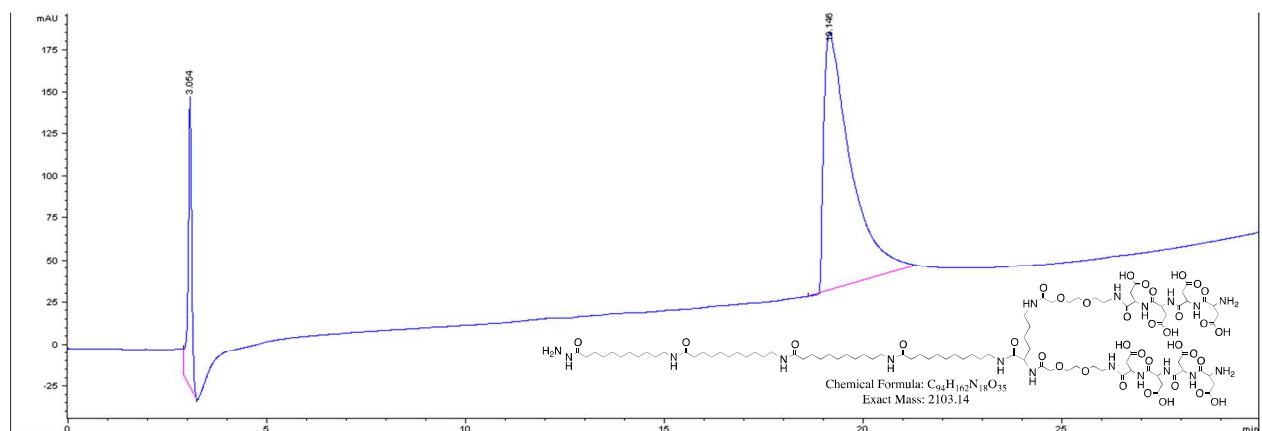

Figure S9: Structure and HPLC profile of A4-K-D4

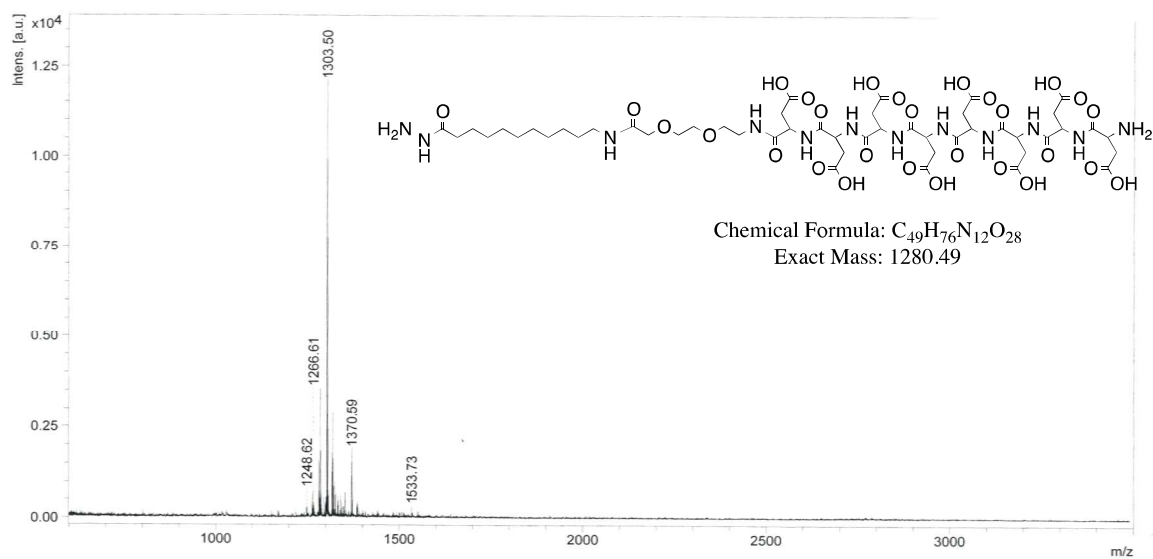

Figure S10: Structure and MALDI-ToF spectrum of A1-D8

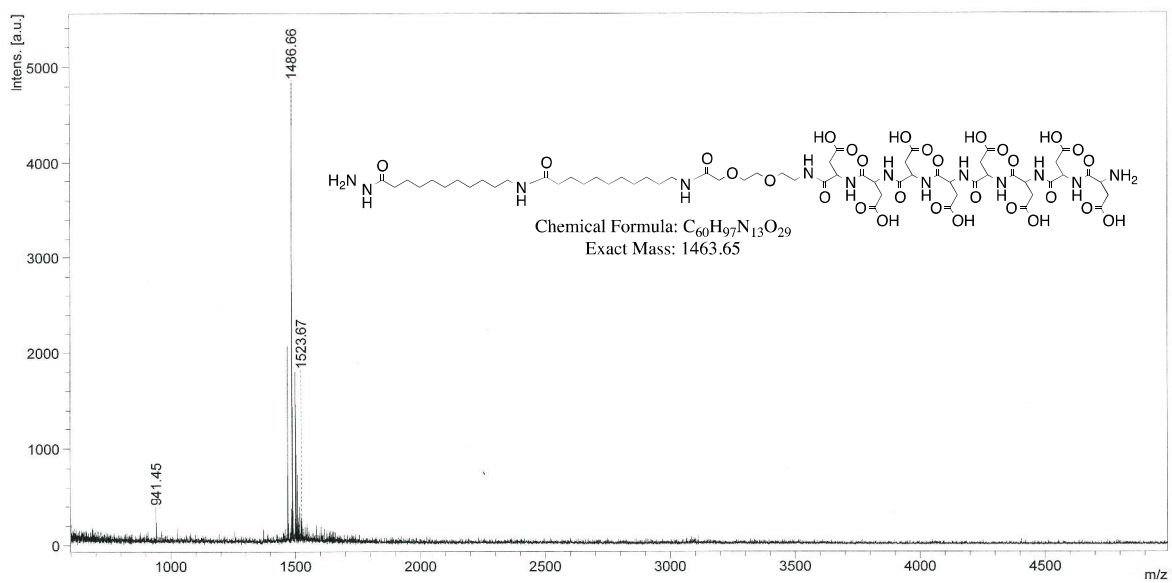

Figure S11: Structure and MALDI-ToF spectrum of A2-D8

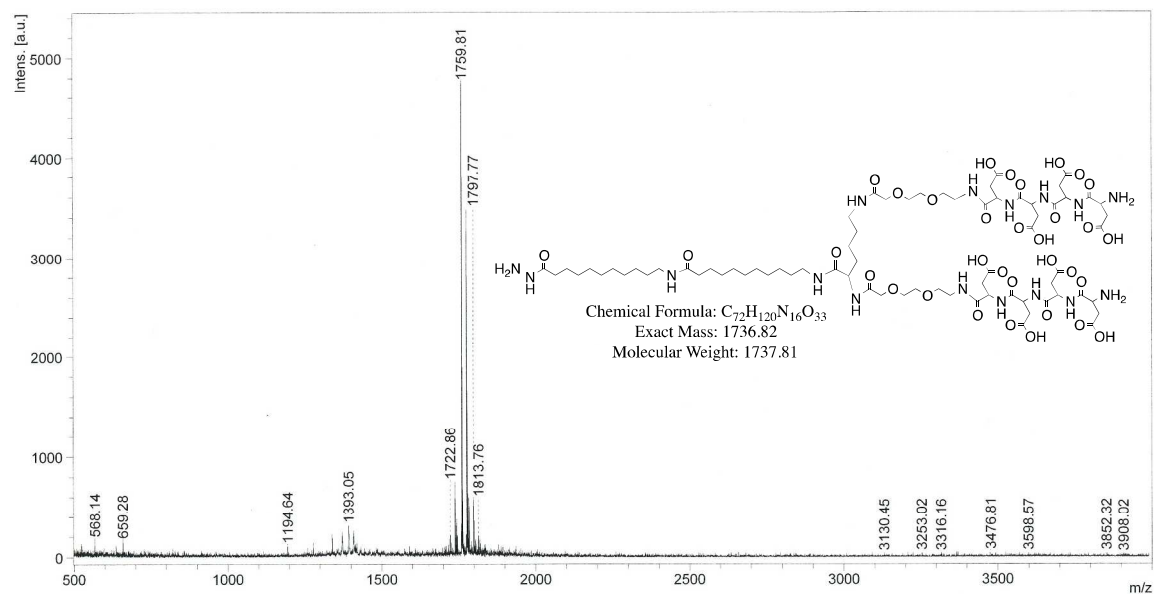

Figure S12: Structure and MALDI-ToF spectrum of A2-K-D4

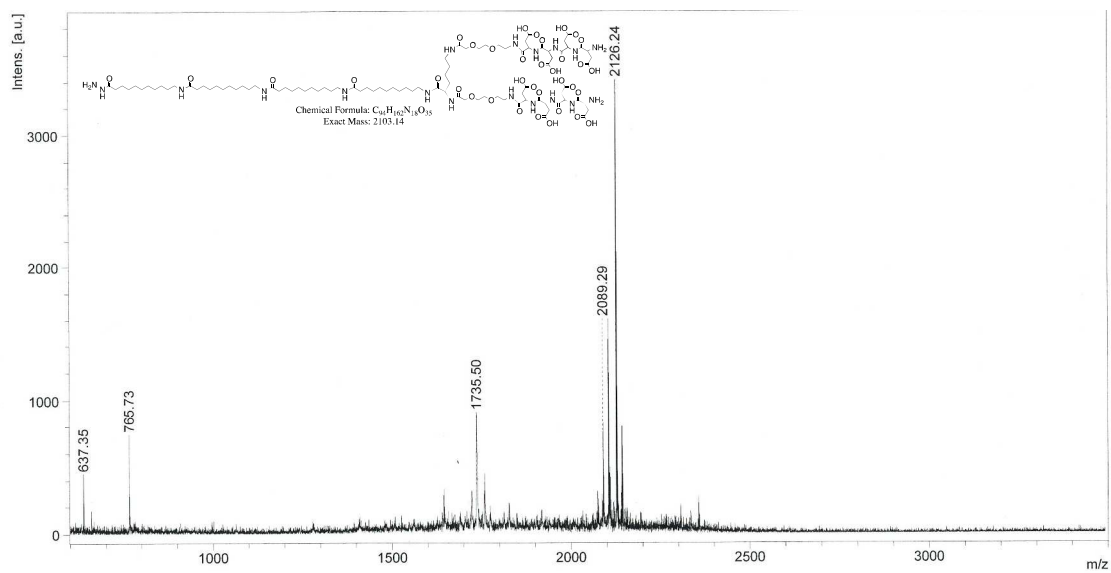

Figure S13: Structure and MALDI-ToF spectrum of A4-K-D4



## Characterization of DOX – unimer conjugates

Below are HPLC profiles (S14-S17) of the four unimers (described above) following conjugation to DOX via hydrazone bond and purification on a LH20 column:

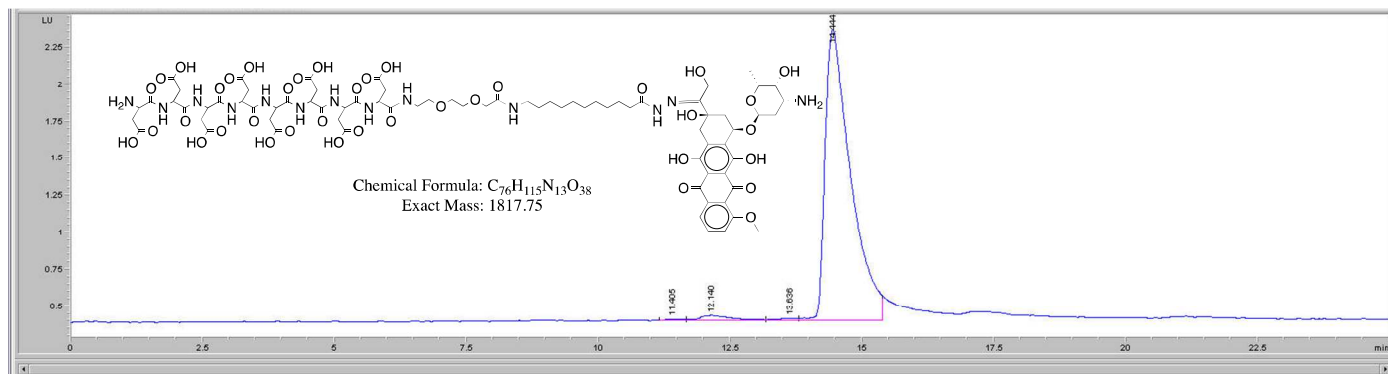

Figure S14: Chemical structure and HPLC profile of DOX-A1-D8

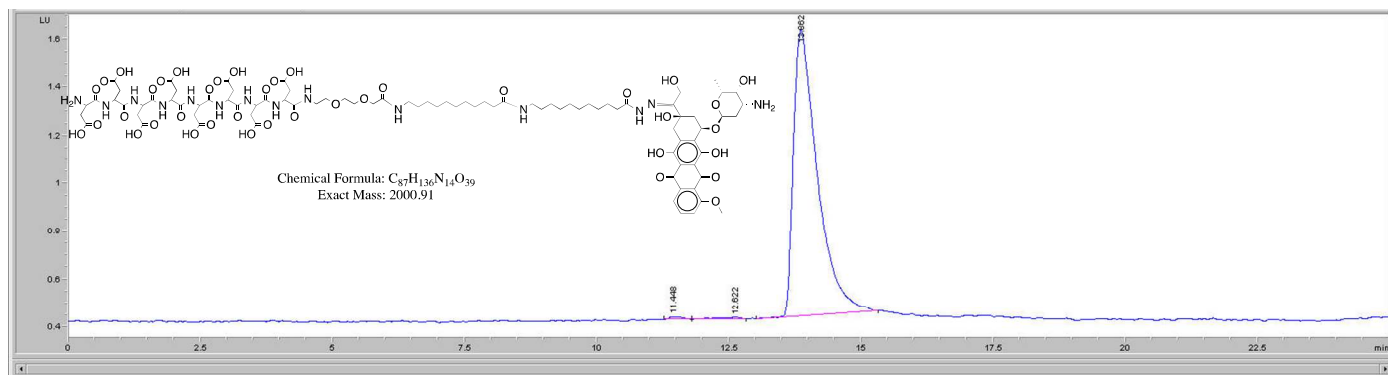

Figure S15: Chemical structure and HPLC profile of DOX-A2-D8

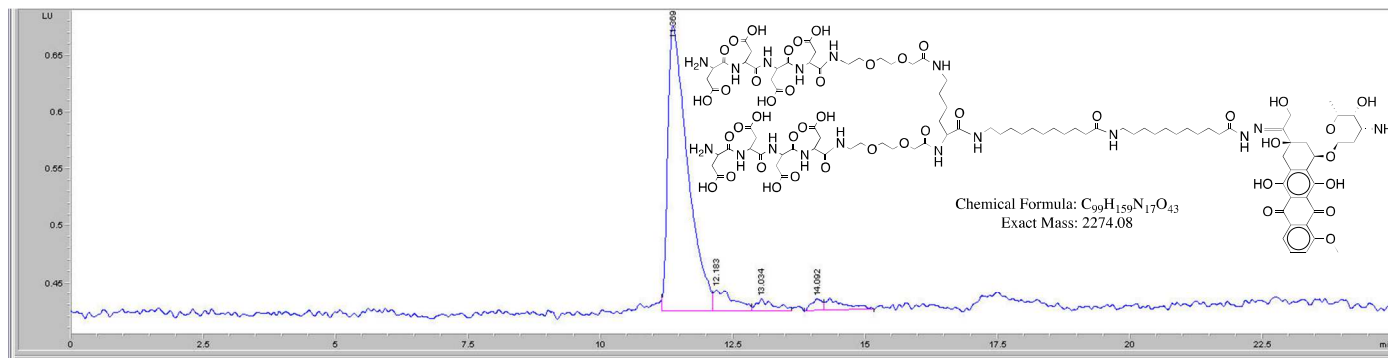

Figure S16: Chemical structure and HPLC profile of DOX-A2-K-D4

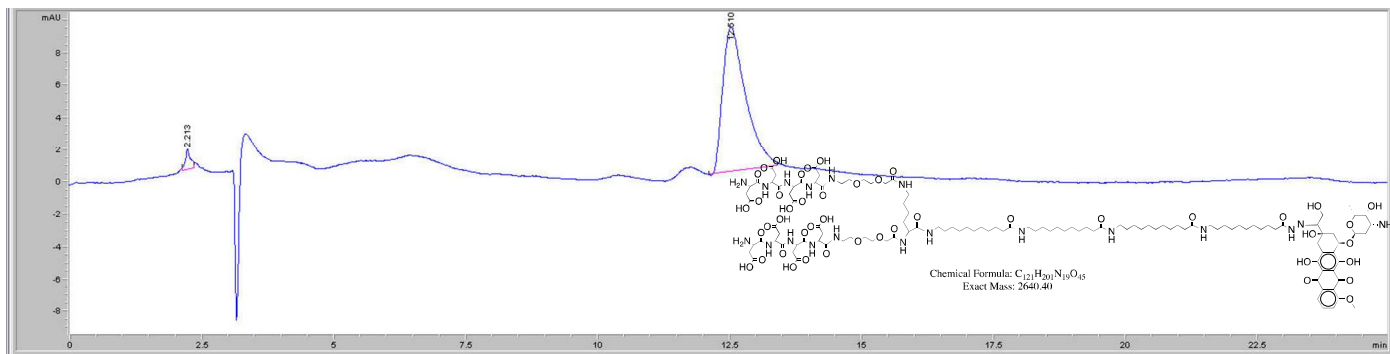

Figure S17: Chemical structure and HPLC profile of DOX-A4-K-D4
